# Supplementary material
Source: HighWire-hosted journal article supplement (https://www.cmaj.ca/highwire/filestream/57762/field_highwire_adjunct_files/4/acupunct-lee-appendix_5.pdf)
Supplement: acupunct-lee-appendix_5.pdf [file acupunct-lee-appendix_5.pdf]

**Appendix 5:** Meta-analysis of sham-controlled randomized clinical trials involving patients in the chronic stage of stroke.

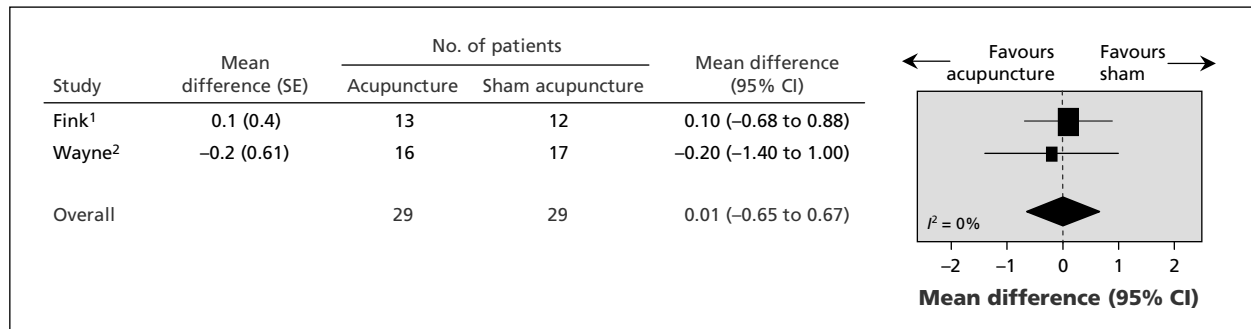

Meta-analysis of sham-controlled randomized clinical trials of the effectiveness of acupuncture for functional recovery after stroke. Trials included patients in the chronic stage of stroke. Mean differences less than zero favour acupuncture. CI = confidence interval, SE = standard error.

**References**

1. Fink M, Rollnik JD, Bijak M, et al. Needle acupuncture in chronic poststroke leg spasticity. *Arch Phys Med Rehabil* 2004;85:667-72.
2. Wayne PM, Krebs DE, Macklin EA, et al. Acupuncture for upper-extremity rehabilitation in chronic stroke: a randomized sham-controlled study. *Arch Phys Med Rehabil* 2005;86:2248-55.
